# Supplementary material for: Projecting the Population Level Burden of CKD Progression According to Urine Albumin-to-Creatinine Ratio Categories
Source: PubMed Central journal article supplement — Kidney Int Rep. 2024 Oct 10;9(12):3464–76. doi: 10.1016/j.ekir.2024.09.021 (PMC11652095; doi:10.1016/j.ekir.2024.09.021), 2024-10-10
Supplement: mmc1.pdf [file mmc1.pdf]

## **Projecting the population level burden of CKD progression according to urine albumin-to-creatinine ratio categories**

Authors: *Luca De Nicola*<sup>1</sup>, *Ricardo Correa-Rotter*<sup>2</sup>, *Juan F. Navarro-González*<sup>3,4,5</sup>, *Albert Power*<sup>6</sup>, *Michal Nowicki*<sup>7</sup>, *Istvan Wittmann*<sup>8</sup>, *Jean-Michel Halimi*<sup>9,10</sup>, *Juan Jose Garcia Sanchez*<sup>11</sup>, *Claudia Cabrera*<sup>12</sup>, *Salvatore Barone*<sup>13</sup>, *Timothy Coker*<sup>14</sup>, and *Lise Retat*<sup>14</sup>

<sup>1</sup>University Luigi, Vanvitelli, Naples, Italy

<sup>2</sup>Instituto Nacional de Ciencias Medicas y Nutricion Salvador Zubiran, Ciudad de Mexico, Mexico

<sup>3</sup>Hospital Universitario Nuestra Señora de Candelaria, Santa Cruz de Tenerife, Spain

<sup>4</sup> RICORS2040, Instituto de Salud Carlos III, Madrid, Spain; ITB, Universidad de La Laguna, Santa Cruz de Tenerife, Spain

<sup>5</sup>Universidad Fernando Pessoa Canarias, Las Palmas de Gran Canaria, Spain

<sup>6</sup>North Bristol NHS Trust, Bristol, UK

<sup>7</sup>Medical University of Lodz, Poland

<sup>8</sup>2<sup>nd</sup> Department of Medicine and Nephrology-Diabetes Center, University of Pécs Medical School, Hungary

<sup>9</sup>Service de Néphrologie-HTA, Dialyses, Transplantation Rénale, CHU Tours, University of Tours, Tours, France

<sup>10</sup>INSERM UMR1327, University of Tours, Tours, France.

<sup>11</sup>Health Economic and Payer Evidence, Biopharmaceuticals, AstraZeneca, Cambridge, UK

<sup>12</sup>Real World Science and Analytics, AstraZeneca, Gothenburg, Sweden

<sup>13</sup>Global Medical Affairs, BioPharmaceuticals, AstraZeneca, Gaithersburg, MD, USA

<sup>14</sup>HealthLumen Limited, London, UK

Corresponding author: Juan Jose Garcia Sanchez

Address: Academy House, 136 Hills Road, Cambridge, United Kingdom, CB2 8PA

Email : [juanjose.garciasanchez@astrazeneca.com](mailto:juanjose.garciasanchez@astrazeneca.com)

Tel : +44 73848 067

## Supplementary data

**Table S1. Projected cumulative transitions from CKD stage G3 to G4 and G4 to G5 (ESKD) (2022-2027) per KDIGO uACR category in the diagnosed and undiagnosed CKD population for 31 countries and regions**

| Country or region | Transition: CKD stage 3 to 4<br>KDIGO uACR category, n (%) |                |               | Transition: CKD stage 4 to 5 (ESKD)<br>KDIGO uACR category, n (%) |               |              |
|-------------------|------------------------------------------------------------|----------------|---------------|-------------------------------------------------------------------|---------------|--------------|
|                   | A1                                                         | A2             | A3            | A1                                                                | A2            | A3           |
| Australia         | 30,908 (73.9)                                              | 9,596 (22.9)   | 1,337 (3.2)   | 9,332 (80.2)                                                      | 2,059 (17.7)  | 242 (2.1)    |
| Belgium           | 53,896 (85.8)                                              | 8,511 (13.6)   | 373 (0.6)     | 20,004 (88.0)                                                     | 2,641 (11.6)  | 98 (0.4)     |
| Brazil            | 88,371 (78.9)                                              | 7,355 (6.6)    | 16,209 (14.5) | 47,181 (87.8)                                                     | 2,251 (4.2)   | 4,278 (8.0)  |
| Canada            | 153,029 (83.8)                                             | 28,093 (15.4)  | 1,481 (0.8)   | 37,728 (85.9)                                                     | 5,951 (13.6)  | 239 (0.5)    |
| China             | 586,467 (75.2)                                             | 168,680 (21.6) | 24,396 (3.1)  | 138,874 (79.9)                                                    | 31,248 (18.0) | 3,615 (2.1)  |
| Colombia          | 58,840 (84.0)                                              | 10,474 (15.0)  | 692 (1.0)     | 17,910 (90.9)                                                     | 1,690 (8.6)   | 93 (0.5)     |
| Denmark           | 1,794 (68.7)                                               | 774 (29.6)     | 44 (1.7)      | 1,476 (85.8)                                                      | 235 (13.7)    | 9 (0.5)      |
| France            | 15,325 (64.3)                                              | 8,125 (34.1)   | 394 (1.7)     | 12,257 (88.6)                                                     | 1,534 (11.1)  | 44 (0.3)     |
| Germany           | 105,544 (75.8)                                             | 32,180 (23.1)  | 1,439 (1.0)   | 20,954 (80.8)                                                     | 4,866 (18.8)  | 122 (0.5)    |
| Greece            | 3,031 (73.4)                                               | 1,034 (25.0)   | 65 (1.6)      | 2,549 (90.9)                                                      | 244 (8.7)     | 12 (0.4)     |
| Hungary           | 2,392 (66.8)                                               | 1,138 (31.8)   | 50 (1.4)      | 2,031 (86.5)                                                      | 303 (12.9)    | 15 (0.6)     |
| India             | 767,609 (82.9)                                             | 134,946 (14.6) | 23,943 (2.6)  | 109,468 (85.2)                                                    | 16,695 (13.0) | 2,258 (1.8)  |
| Israel            | 12,545 (68.2)                                              | 4,745 (25.8)   | 1,103 (6.0)   | 4,945 (72.7)                                                      | 1,579 (23.2)  | 281 (4.1)    |
| Italy             | 11,685 (75.4)                                              | 3,290 (21.2)   | 516 (3.3)     | 7,023 (89.9)                                                      | 677 (8.7)     | 111 (1.4)    |
| Japan             | 1,080,736 (78.9)                                           | 261,365 (19.1) | 28,267 (2.1)  | 123,393 (79.9)                                                    | 28,234 (18.3) | 2,822 (1.8)  |
| Saudi Arabia      | 91,767 (79.3)                                              | 19,309 (16.7)  | 4,586 (4.0)   | 45,116 (86.7)                                                     | 5,622 (10.8)  | 1,275 (2.5)  |
| Mexico            | 34,587 (50.3)                                              | 14,111 (20.5)  | 20,095 (29.2) | 15,847 (76.0)                                                     | 2,452 (11.8)  | 2,551 (12.2) |
| Netherlands       | 4,679 (64.4)                                               | 2,448 (33.7)   | 143 (2.0)     | 3,124 (86.4)                                                      | 473 (13.1)    | 18 (0.5)     |
| Philippines       | 11,564 (69.5)                                              | 1,558 (9.4)    | 3,523 (21.2)  | 9,818 (88.5)                                                      | 413 (3.7)     | 857 (7.7)    |
| Poland            | 8,380 (64.9)                                               | 3,572 (27.7)   | 960 (7.4)     | 5,733 (84.0)                                                      | 904 (13.3)    | 185 (2.7)    |
| Romania           | 3,169 (75.2)                                               | 995 (23.6)     | 52 (1.2)      | 3,427 (94.4)                                                      | 189 (5.2)     | 14 (0.4)     |

| Country or region                            | Transition: CKD stage 3 to 4<br>KDIGO uACR category, n (%) |                |              | Transition: CKD stage 4 to 5 (ESKD)<br>KDIGO uACR category, n (%) |               |             |
|----------------------------------------------|------------------------------------------------------------|----------------|--------------|-------------------------------------------------------------------|---------------|-------------|
|                                              | A1                                                         | A2             | A3           | A1                                                                | A2            | A3          |
| Singapore                                    | 1,418 (49.4)                                               | 1,182 (41.2)   | 268 (9.3)    | 1,540 (76.9)                                                      | 391 (19.5)    | 71 (3.5)    |
| South Korea                                  | 79,540 (74.3)                                              | 23,902 (22.3)  | 3,550 (3.3)  | 26,755 (85.0)                                                     | 4,177 (13.3)  | 559 (1.8)   |
| Spain                                        | 143,848 (87.8)                                             | 18,782 (11.5)  | 1,294 (0.8)  | 37,244 (90.7)                                                     | 3,651 (8.9)   | 189 (0.5)   |
| Sweden                                       | 2,068 (67.5)                                               | 823 (26.9)     | 173 (5.6)    | 1,319 (86.2)                                                      | 183 (12.0)    | 29 (1.9)    |
| Taiwan                                       | 35,799 (73.8)                                              | 11,126 (23)    | 1,553 (3.2)  | 11,280 (83.4)                                                     | 1,984 (14.7)  | 258 (1.9)   |
| Thailand                                     | 363,263 (82.0)                                             | 67,852 (15.3)  | 11,683 (2.6) | 113,286 (85.8)                                                    | 16,331 (12.4) | 2,404 (1.8) |
| Turkey                                       | 221,591 (73.3)                                             | 69,016 (22.8)  | 11,903 (3.9) | 33,906 (75.7)                                                     | 9,440 (21.1)  | 1,462 (3.3) |
| UAE                                          | 249 (53.5)                                                 | 170 (36.6)     | 46 (9.9)     | 385 (83.2)                                                        | 65 (14.0)     | 13 (2.8)    |
| UK                                           | 276,353 (84.5)                                             | 48,357 (14.8)  | 2,263 (0.7)  | 59,419 (85.5)                                                     | 9,650 (13.9)  | 408 (0.6)   |
| USA                                          | 833,375 (70.9)                                             | 284,269 (24.2) | 58,077 (4.9) | 146,621 (75.5)                                                    | 39,961 (20.6) | 7,698 (4.0) |
| <b>Total, n</b>                              | 5,083,822                                                  | 1,247,778      | 220,478      | 1,069,945                                                         | 196,093       | 32,230      |
| <b>Percentage unweighted average, % (SD)</b> | 72.8 (9.8)                                                 | 22.2 (8.1)     | 5.0 (6.3)    | 84.4 (5.3)                                                        | 13.2 (4.8)    | 2.4 (2.7)   |
| <b>Percentage weighted average, %</b>        | 77.6                                                       | 19.0           | 3.4          | 82.4                                                              | 15.1          | 2.5         |

Abbreviations – ESKD: end-stage kidney disease; KDIGO: Kidney Disease: Improving Global Outcomes; SD: standard deviation; uACR: urinary albumin-creatinine ratio

**Table S2. Projected cumulative incidence of heart failure and myocardial infarction (2022-2027) per KDIGO uACR category in the diagnosed and undiagnosed CKD population (CKD stages G3–G5) for 31 countries and regions**

| Country or region | Heart failure              |                |               | Myocardial infarction      |                |               |
|-------------------|----------------------------|----------------|---------------|----------------------------|----------------|---------------|
|                   | KDIGO uACR category, n (%) |                |               | KDIGO uACR category, n (%) |                |               |
|                   | A1                         | A2             | A3            | A1                         | A2             | A3            |
| Australia         | 66,731 (85.3)              | 10,221 (13.1)  | 1,281 (1.6)   | 17,191 (84.6)              | 2,774 (13.6)   | 359 (1.8)     |
| Belgium           | 49,350 (89.1)              | 5,849 (10.6)   | 218 (0.4)     | 28,491 (88.8)              | 3,438 (10.7)   | 157 (0.5)     |
| Brazil            | 596,406 (91.3)             | 20,030 (3.1)   | 36,772 (5.6)  | 311,198 (90.4)             | 11,932 (3.5)   | 21,057 (6.1)  |
| Canada            | 195,046 (88.3)             | 24,677 (11.2)  | 1,067 (0.5)   | 101,665 (88.0)             | 13,214 (11.4)  | 602 (0.5)     |
| China             | 257,419 (90.2)             | 23,600 (8.3)   | 4,502 (1.6)   | 1,533,796 (84.9)           | 239,856 (13.3) | 32,903 (1.8)  |
| Colombia          | 123,058 (93.6)             | 7,990 (6.1)    | 413 (0.3)     | 65,735 (93.5)              | 4,390 (6.2)    | 209 (0.3)     |
| Denmark           | 27,644 (90.1)              | 2,917 (9.5)    | 118 (0.4)     | 20,749 (89.9)              | 2,232 (9.7)    | 91 (0.4)      |
| France            | 127,274 (89.1)             | 14,989 (10.5)  | 645 (0.5)     | 38,884 (89.8)              | 4,206 (9.7)    | 217 (0.5)     |
| Germany           | 26,506 (84.1)              | 4,743 (15.1)   | 250 (0.8)     | 4,869 (83.5)               | 943 (16.2)     | 22 (0.4)      |
| Greece            | 38,121 (93.9)              | 2,383 (5.9)    | 94 (0.2)      | 53,569 (93.1)              | 3,813 (6.6)    | 175 (0.3)     |
| Hungary           | 79,801 (91.3)              | 7,363 (8.4)    | 259 (0.3)     | 17,560 (90.6)              | 1,766 (9.1)    | 59 (0.3)      |
| India             | 1,229,418 (89.2)           | 128,180 (9.3)  | 20,107 (1.5)  | 1,274,460 (88.5)           | 145,013 (10.1) | 21,144 (1.5)  |
| Israel            | 10,088 (75.2)              | 2,849 (21.3)   | 469 (3.5)     | 4,419 (75.9)               | 1,171 (20.1)   | 233 (4.0)     |
| Italy             | 105,128 (92.8)             | 7,275 (6.4)    | 842 (0.7)     | 150,126 (92.1)             | 11,392 (7.0)   | 1,481 (0.9)   |
| Japan             | 813,771 (84.2)             | 138,653 (14.3) | 14,535 (1.5)  | 886,547 (83.6)             | 157,323 (14.8) | 16,391 (1.5)  |
| Saudi Arabia      | 78,493 (84.4)              | 11,987 (12.9)  | 2,543 (2.7)   | 42,459 (85.1)              | 6,236 (12.5)   | 1,188 (2.4)   |
| Mexico            | 160,295 (76.4)             | 25,887 (12.3)  | 23,673 (11.3) | 192,673 (76.4)             | 30,509 (12.1)  | 28,974 (11.5) |
| Netherlands       | 59,182 (89.8)              | 6,491 (9.8)    | 260 (0.4)     | 66,100 (89.8)              | 7,205 (9.8)    | 339 (0.5)     |
| Philippines       | 207,878 (91.5)             | 6,816 (3.0)    | 12,401 (5.5)  | 222,908 (91.3)             | 7,521 (3.1)    | 13,837 (5.7)  |
| Poland            | 162,053 (87.7)             | 19,029 (10.3)  | 3620 (2.0)    | 154,777 (88.0)             | 17,562 (10.0)  | 3,527 (2.0)   |
| Romania           | 787,67 (96.8)              | 2,509 (3.1)    | 92 (0.1)      | 71,150 (96.9)              | 2,179 (3.0)    | 94 (0.1)      |
| Singapore         | 6,070 (88.4)               | 637 (9.3)      | 162 (2.4)     | 20,239 (79.0)              | 4,518 (17.6)   | 872 (3.4)     |
| South Korea       | 75,412 (84.0)              | 12,920 (14.4)  | 1,476 (1.6)   | 21,071 (84.3)              | 3,507 (14.0)   | 409 (1.6)     |
| Spain             | 194,883 (93.0)             | 14,066 (6.7)   | 705 (0.3)     | 101,151 (92.3)             | 8,113 (7.4)    | 303 (0.3)     |

| Country or region                            | Heart failure              |                |              | Myocardial infarction      |               |              |
|----------------------------------------------|----------------------------|----------------|--------------|----------------------------|---------------|--------------|
|                                              | KDIGO uACR category, n (%) |                |              | KDIGO uACR category, n (%) |               |              |
|                                              | A1                         | A2             | A3           | A1                         | A2            | A3           |
| Sweden                                       | 41,047 (90.8)              | 3,637 (8.0)    | 535 (1.2)    | 14,245 (90.7)              | 1,255 (8.0)   | 199 (1.3)    |
| Taiwan                                       | 35,163 (85.8)              | 5,161 (12.6)   | 663 (1.6)    | 23,261 (84.7)              | 3,725 (13.6)  | 464 (1.7)    |
| Thailand                                     | 154,247 (91.8)             | 11,455 (6.8)   | 2,360 (1.4)  | 532,826 (85.6)             | 77,882 (12.5) | 12,068 (1.9) |
| Turkey                                       | 121,290 (79.6)             | 26,731 (17.6)  | 4,277 (2.8)  | 62,727 (78.1)              | 15,396 (19.2) | 2,162 (2.7)  |
| UAE                                          | 4,083 (84.7)               | 604 (12.5)     | 132 (2.7)    | 2,250 (85.0)               | 326 (12.3)    | 72 (2.7)     |
| UK                                           | 174,043 (88.1)             | 22,517 (11.4)  | 988 (0.5)    | 102,225 (88.4)             | 12,746 (11.0) | 639 (0.6)    |
| USA                                          | 1,120,440 (79.2)           | 249,829 (17.7) | 43,954 (3.1) | 395,807 (79.3)             | 86,535 (17.3) | 16,619 (3.3) |
| <b>Total, n</b>                              | 6,419,107                  | 821,997        | 179,413      | 6,535,131                  | 888,679       | 176,867      |
| <b>Percentage unweighted average, % (SD)</b> | 87.7 (5.1)                 | 10.4 (4.3)     | 1.9 (2.2)    | 86.8 (5.2)                 | 11.1 (4.4)    | 2.0 (2.3)    |
| <b>Percentage weighted average, %</b>        | 86.5                       | 11.1           | 2.4          | 86.0                       | 11.7          | 2.3          |

Abbreviations – KDIGO: Kidney Disease: Improving Global Outcomes; SD: standard deviation; uACR: urinary albumin-creatinine ratio

**Table S3. Projected cumulative incidence of stroke and all-cause mortality (2022-2027) per KDIGO uACR category in the diagnosed and undiagnosed CKD population (CKD stages G3–G5) for 31 countries and regions**

| Country or region | Stroke                     |                |               | Death (all-cause)          |                  |                |
|-------------------|----------------------------|----------------|---------------|----------------------------|------------------|----------------|
|                   | KDIGO uACR category, n (%) |                |               | KDIGO uACR category, n (%) |                  |                |
|                   | A1                         | A2             | A3            | A1                         | A2               | A3             |
| Australia         | 22,194 (74.7)              | 6,557 (22.1)   | 950 (3.2)     | 230,469 (74.0)             | 68,840 (22.1)    | 12,161 (3.9)   |
| Belgium           | 25,410 (84.6)              | 4,443 (14.8)   | 189 (0.6)     | 377,644 (84.2)             | 67,467 (15.0)    | 3,574 (0.8)    |
| Brazil            | 257,825 (84.3)             | 14,863 (4.9)   | 33,189 (10.9) | 4,056,180 (82.7)           | 233,188 (4.8)    | 614,907 (12.5) |
| Canada            | 150,062 (83.3)             | 28,595 (15.9)  | 1,500 (0.8)   | 938,265 (82.6)             | 185,171 (16.3)   | 12,042 (1.1)   |
| China             | 1,394,268 (79.6)           | 314,073 (17.9) | 43,980 (2.5)  | 9,080,382 (77.1)           | 2,289,022 (19.4) | 402,140 (3.4)  |
| Colombia          | 14,374 (90.6)              | 1,396 (8.8)    | 96 (0.6)      | 552,495 (88.7)             | 65,603 (10.5)    | 4,757 (0.8)    |
| Denmark           | 23,225 (84.3)              | 4,092 (14.9)   | 222 (0.8)     | 178,124 (83.0)             | 34,305 (16.0)    | 2,136 (1.0)    |
| France            | 95,935 (83.9)              | 17,408 (15.2)  | 1,066 (0.9)   | 988,901 (81.8)             | 206,987 (17.1)   | 12,870 (1.1)   |
| Germany           | 10,928 (76.9)              | 3,140 (22.1)   | 144 (1.0)     | 692,284 (76.3)             | 203,717 (22.5)   | 11,010 (1.2)   |
| Greece            | 43,624 (90.2)              | 4,507 (9.3)    | 253 (0.5)     | 322,503 (88.8)             | 38,182 (10.5)    | 2,609 (0.7)    |
| Hungary           | 36,369 (85.8)              | 5,788 (13.7)   | 236 (0.6)     | 324,471 (84.5)             | 56,758 (14.8)    | 2,940 (0.8)    |
| India             | 965,288 (84.3)             | 154,183 (13.5) | 25,144 (2.2)  | 8,434,339 (82.9)           | 1,444,771 (14.2) | 290,007 (2.9)  |
| Israel            | 6,991 (64.2)               | 3,154 (28.9)   | 751 (6.9)     | 101,743 (63.0)             | 47,428 (29.4)    | 12,270 (7.6)   |
| Italy             | 120,477 (88.2)             | 14,017 (10.3)  | 2,061 (1.5)   | 783,685 (87.6)             | 93,690 (10.5)    | 17,733 (2.0)   |
| Japan             | 518,357 (77.4)             | 134,388 (20.1) | 16,923 (2.5)  | 4,300,349 (77.2)           | 1,111,792 (20.0) | 156,997 (2.8)  |
| Saudi Arabia      | 21,650 (74.7)              | 5,882 (20.3)   | 1,436 (5.0)   | 221,803 (70.9)             | 71,320 (22.8)    | 19,516 (6.2)   |
| Mexico            | 77,086 (64.3)              | 19,913 (16.6)  | 22,922 (19.1) | 1,203,806 (59.7)           | 337,077 (16.7)   | 475,375 (23.6) |
| Netherlands       | 47,633 (84.0)              | 8,604 (15.2)   | 447 (0.8)     | 389,071 (82.9)             | 75,552 (16.1)    | 4,599 (1.0)    |
| Philippines       | 135,087 (85.5)             | 7,012 (4.4)    | 15,892 (10.1) | 1,003,425 (83.2)           | 55,991 (4.6)     | 147,347 (12.2) |
| Poland            | 313,354 (86.9)             | 40,278 (11.2)  | 6,928 (1.9)   | 831,452 (74.9)             | 220,417 (19.9)   | 58,463 (5.3)   |
| Romania           | 155,272 (96.6)             | 5,256 (3.3)    | 205 (0.1)     | 303,490 (94.5)             | 16,852 (5.2)     | 793 (0.2)      |
| Singapore         | 8,653 (73.0)               | 2,682 (22.6)   | 511 (4.3)     | 74,776 (69.3)              | 26,361 (24.4)    | 6,775 (6.3)    |
| South Korea       | 45,108 (77.5)              | 11,427 (19.6)  | 1,655 (2.8)   | 322,801 (76.1)             | 86,939 (20.5)    | 14,301 (3.4)   |
| Spain             | 91,161 (88.1)              | 11,558 (11.2)  | 800 (0.8)     | 1,244,076 (88.8)           | 146,141 (10.4)   | 10,074 (0.7)   |

| Country or region                            | Stroke                     |                |              | Death (all-cause)          |                  |               |
|----------------------------------------------|----------------------------|----------------|--------------|----------------------------|------------------|---------------|
|                                              | KDIGO uACR category, n (%) |                |              | KDIGO uACR category, n (%) |                  |               |
|                                              | A1                         | A2             | A3           | A1                         | A2               | A3            |
| Sweden                                       | 25,071 (85.7)              | 3,493 (11.9)   | 685 (2.3)    | 205,190 (84.4)             | 30,728 (12.6)    | 7,055 (2.9)   |
| Taiwan                                       | 12,868 (76.7)              | 3,414 (20.3)   | 502 (3.0)    | 181,999 (76.6)             | 47,824 (20.1)    | 7,815 (3.3)   |
| Thailand                                     | 218,130 (80.5)             | 45,674 (16.9)  | 7,223 (2.7)  | 1,658,852 (77.3)           | 403,642 (18.8)   | 84,494 (3.9)  |
| Turkey                                       | 53,298 (69.4)              | 19,942 (26.0)  | 3,567 (4.6)  | 988,877 (69.4)             | 366,716 (25.7)   | 68,661 (4.8)  |
| UAE                                          | 1,811 (76.8)               | 436 (18.5)     | 111 (4.7)    | 7,757 (70.3)               | 2,499 (22.7)     | 775 (7.0)     |
| UK                                           | 241,497 (83.2)             | 46,239 (15.9)  | 2,381 (0.8)  | 2,025,603 (83.1)           | 388,633 (15.9)   | 23,252 (1.0)  |
| USA                                          | 912,004 (70.0)             | 323,086 (24.8) | 67,423 (5.2) | 5,246,667 (65.1)           | 2,206,843 (27.4) | 601,431 (7.5) |
| <b>Total, n</b>                              | 6,045,011                  | 1,265,500      | 259,392      | 47,271,478                 | 10,630,456       | 3,088,878     |
| <b>Percentage unweighted average, % (SD)</b> | 80.8 (7.6)                 | 15.8 (6.2)     | 3.3 (3.9)    | 78.7 (8.2)                 | 17.0 (6.4)       | 4.3 (4.8)     |
| <b>Percentage unweighted average, %</b>      | 79.9                       | 16.7           | 3.4          | 77.5                       | 17.4             | 5.1           |

Abbreviations – KDIGO: Kidney Disease: Improving Global Outcomes; SD: standard deviation; uACR: urinary albumin-creatinine ratio

**Table S4. Projected costs associated with heart failure and myocardial infarction in the diagnosed population (CKD stages G3–G5) (prevalence – 2027) per uACR category for 31 countries and regions**

| Country or region                            | Heart failure (billion USD) |               |              |
|----------------------------------------------|-----------------------------|---------------|--------------|
|                                              | KDIGO uACR category, n (%)  |               |              |
|                                              | A1                          | A2            | A3           |
| Australia                                    | 3.091 (43.3)                | 3.551 (49.8)  | 0.493 (6.9)  |
| Belgium                                      | 1.423 (73.9)                | 0.481 (25.0)  | 0.022 (1.2)  |
| Brazil                                       | 4.118 (78.8)                | 0.383 (7.3)   | 0.726 (13.9) |
| Canada                                       | 3.980 (71.1)                | 1.543 (27.6)  | 0.077 (1.4)  |
| China                                        | 10.693 (21.0)               | 34.382 (67.4) | 5.935 (11.6) |
| Colombia                                     | 1.478 (75.6)                | 0.449 (23.0)  | 0.027 (1.4)  |
| Denmark                                      | 0.369 (71.0)                | 0.144 (27.8)  | 0.006 (1.2)  |
| France                                       | 2.621 (65.0)                | 1.340 (33.2)  | 0.072 (1.8)  |
| Germany                                      | 0.246 (31.9)                | 0.508 (65.7)  | 0.019 (2.4)  |
| Greece                                       | 1.018 (72.3)                | 0.365 (25.9)  | 0.025 (1.7)  |
| Hungary                                      | 0.035 (69.2)                | 0.015 (29.6)  | 0.001 (1.2)  |
| India                                        | 12.640 (36.2)               | 19.005 (54.5) | 3.236 (9.3)  |
| Israel                                       | 0.09 (43.2)                 | 0.098 (47.1)  | 0.020 (9.7)  |
| Italy                                        | 6.779 (56.9)                | 4.498 (37.8)  | 0.629 (5.3)  |
| Japan                                        | 25.646 (57.3)               | 17.256 (38.6) | 1.828 (4.1)  |
| Saudi Arabia                                 | 3.310 (42.2)                | 2.244 (28.6)  | 2.296 (29.2) |
| Mexico                                       | 0.916 (68.4)                | 0.402 (30.1)  | 0.020 (1.5)  |
| Netherlands                                  | 2.660 (64.8)                | 0.485 (11.8)  | 0.958 (23.3) |
| Philippines                                  | 3.230 (61.3)                | 1.664 (31.6)  | 0.375 (7.1)  |
| Poland                                       | 0.518 (82.3)                | 0.108 (17.2)  | 0.003 (0.5)  |
| Romania                                      | 3.609 (54.8)                | 2.470 (37.5)  | 0.510 (7.7)  |
| Singapore                                    | 0.237 (43.2)                | 0.252 (45.9)  | 0.060 (10.9) |
| South Korea                                  | 0.065 (44.5)                | 0.073 (49.4)  | 0.009 (6.1)  |
| Spain                                        | 5.758 (78.1)                | 1.531 (20.8)  | 0.085 (1.2)  |
| Sweden                                       | 0.700 (66.5)                | 0.299 (28.4)  | 0.053 (5.1)  |
| Taiwan                                       | 0.096 (41.3)                | 0.119 (51.1)  | 0.018 (7.6)  |
| Thailand                                     | 2.083 (69.6)                | 0.775 (25.9)  | 0.134 (4.5)  |
| Turkey                                       | 0.585 (43.5)                | 0.649 (48.2)  | 0.112 (8.3)  |
| UAE                                          | 0.192 (53.5)                | 0.137 (38.1)  | 0.030 (8.3)  |
| UK                                           | 0.123 (73.1)                | 0.043 (25.6)  | 0.002 (1.3)  |
| USA                                          | 77.352 (45.6)               | 76.695 (45.2) | 15.560 (9.2) |
| <b>Total, n</b>                              | 175.662                     | 171.965       | 33.341       |
| <b>Percentage unweighted average, % (SD)</b> | 58.0 (16.0)                 | 35.0 (14.5)   | 6.5 (6.6)    |
| <b>Percentage weighted average, %</b>        | 46.1                        | 45.1          | 8.8          |

Abbreviations – KDIGO: Kidney Disease: Improving Global Outcomes; SD: standard deviation; uACR: urinary albumin-creatinine ratio



**Table S5. Projected costs associated with myocardial infarction in the diagnosed population (CKD stages G3–G5) (prevalence – 2027) per uACR category for 31 countries and regions**

| Country or region                            | Myocardial infarction (billion USD) |               |               |
|----------------------------------------------|-------------------------------------|---------------|---------------|
|                                              | KDIGO uACR category, n (%)          |               |               |
|                                              | A1                                  | A2            | A3            |
| Australia                                    | 1.366 (46.6)                        | 1.387 (47.3)  | 0.179 (6.1)   |
| Belgium                                      | 1.642 (68.2)                        | 0.723 (30.0)  | 0.042 (1.8)   |
| Brazil                                       | 16.815 (83.0)                       | 1.301 (6.4)   | 2.145 (10.6)  |
| Canada                                       | 3.269 (69.1)                        | 1.383 (29.2)  | 0.08 (1.7)    |
| China                                        | 32.406 (27.2)                       | 75.425 (63.3) | 11.284 (9.5)  |
| Colombia                                     | 22.048 (75.0)                       | 6.909 (23.5)  | 0.428 (1.5)   |
| Denmark                                      | 1.355 (71.1)                        | 0.525 (27.5)  | 0.025 (1.3)   |
| France                                       | 1.835 (56.7)                        | 1.314 (40.6)  | 0.088 (2.7)   |
| Germany                                      | 0.298 (26.2)                        | 0.802 (70.6)  | 0.036 (3.2)   |
| Greece                                       | 1.166 (79.6)                        | 0.282 (19.2)  | 0.017 (1.2)   |
| Hungary                                      | 0.111 (69.8)                        | 0.046 (28.9)  | 0.002 (1.3)   |
| India                                        | 13.632 (40.4)                       | 17.172 (50.9) | 2.911 (8.6)   |
| Israel                                       | 0.277 (38.3)                        | 0.364 (50.3)  | 0.082 (11.3)  |
| Italy                                        | 7.844 (63.7)                        | 3.898 (31.7)  | 0.570 (4.6)   |
| Japan                                        | 75.412 (60.4)                       | 44.779 (35.9) | 4.662 (3.7)   |
| Saudi Arabia                                 | 40.679 (42.5)                       | 27.843 (29.1) | 27.148 (28.4) |
| Mexico                                       | 0.838 (62.8)                        | 0.469 (35.1)  | 0.028 (2.1)   |
| Netherlands                                  | 1.242 (68.3)                        | 0.202 (11.1)  | 0.376 (20.7)  |
| Philippines                                  | 4.706 (61.4)                        | 2.424 (31.6)  | 0.534 (7.0)   |
| Poland                                       | 0.610 (82.6)                        | 0.124 (16.7)  | 0.005 (0.7)   |
| Romania                                      | 4.413 (53.5)                        | 3.199 (38.8)  | 0.641 (7.8)   |
| Singapore                                    | 0.926 (49.7)                        | 0.767 (41.1)  | 0.171 (9.2)   |
| South Korea                                  | 0.923 (45.6)                        | 0.972 (48.0)  | 0.13 (6.4)    |
| Spain                                        | 4.417 (81.8)                        | 0.944 (17.5)  | 0.039 (0.7)   |
| Sweden                                       | 0.196 (64.0)                        | 0.093 (30.2)  | 0.018 (5.8)   |
| Taiwan                                       | 0.065 (46.4)                        | 0.067 (47.8)  | 0.008 (5.8)   |
| Thailand                                     | 3.246 (70.8)                        | 1.160 (25.3)  | 0.178 (3.9)   |
| Turkey                                       | 0.154 (51.9)                        | 0.126 (42.4)  | 0.017 (5.7)   |
| UAE                                          | 0.161 (52.2)                        | 0.122 (39.5)  | 0.026 (8.3)   |
| UK                                           | 0.202 (69.7)                        | 0.083 (28.6)  | 0.005 (1.7)   |
| USA                                          | 20.796 (44.2)                       | 21.866 (46.5) | 4.359 (9.3)   |
| <b>Total, n</b>                              | 263.051                             | 216.770       | 56.234        |
| <b>Percentage unweighted average, % (SD)</b> | 58.8 (15.5)                         | 35.0 (14.3)   | 6.2 (5.9)     |
| <b>Percentage weighted average, %</b>        | 49.1                                | 40.4          | 10.5          |

Abbreviations – KDIGO: Kidney Disease: Improving Global Outcomes; SD: standard deviation; uACR: urinary albumin-creatinine ratio

**Table S6. Projected costs associated with stroke in the diagnosed population (CKD stages G3–G5) (prevalence – 2027) per uACR category for 31 countries and regions**

| Country or region                            | Stroke (billion USD)       |               |               |
|----------------------------------------------|----------------------------|---------------|---------------|
|                                              | KDIGO uACR category, n (%) |               |               |
|                                              | A1                         | A2            | A3            |
| Australia                                    | 0.067 (39.7)               | 0.087 (51.6)  | 0.015 (8.7)   |
| Belgium                                      | 1.036 (65.5)               | 0.52 (32.8)   | 0.027 (1.7)   |
| Brazil                                       | 0.334 (72.5)               | 0.039 (8.5)   | 0.087 (19.0)  |
| Canada                                       | 3.380 (63.8)               | 1.811 (34.2)  | 0.108 (2.0)   |
| China                                        | 9.117 (26.5)               | 21.947 (63.7) | 3.382 (9.8)   |
| Colombia                                     | 0.480 (69.7)               | 0.195 (28.4)  | 0.013 (1.9)   |
| Denmark                                      | 0.569 (65.1)               | 0.287 (32.9)  | 0.018 (2.0)   |
| France                                       | 6.481 (54.8)               | 5.029 (42.5)  | 0.327 (2.8)   |
| Germany                                      | 0.539 (25.1)               | 1.531 (71.2)  | 0.080 (3.7)   |
| Greece                                       | 0.612 (75.5)               | 0.186 (22.9)  | 0.013 (1.6)   |
| Hungary                                      | 0.246 (65.6)               | 0.123 (32.8)  | 0.006 (1.6)   |
| India                                        | 14.098 (40.5)              | 17.569 (50.5) | 3.114 (9.0)   |
| Israel                                       | 0.267 (35.4)               | 0.384 (51.0)  | 0.102 (13.6)  |
| Italy                                        | 4.804 (58.4)               | 2.971 (36.1)  | 0.446 (5.4)   |
| Japan                                        | 10.066 (55.4)              | 7.214 (39.7)  | 0.893 (4.9)   |
| Saudi Arabia                                 | 0.992 (31.4)               | 0.939 (29.7)  | 1.231 (38.9)  |
| Mexico                                       | 0.494 (59.0)               | 0.324 (38.7)  | 0.020 (2.3)   |
| Netherlands                                  | 1.430 (59.0)               | 0.296 (12.2)  | 0.696 (28.7)  |
| Philippines                                  | 9.077 (56.0)               | 5.695 (35.2)  | 1.424 (8.8)   |
| Poland                                       | 1.306 (77.7)               | 0.359 (21.4)  | 0.015 (0.9)   |
| Romania                                      | 1.186 (45.3)               | 1.159 (44.3)  | 0.270 (10.3)  |
| Singapore                                    | 0.435 (41.6)               | 0.495 (47.4)  | 0.115 (11)    |
| South Korea                                  | 1.131 (36.2)               | 1.697 (54.3)  | 0.299 (9.6)   |
| Spain                                        | 2.687 (73.7)               | 0.899 (24.7)  | 0.058 (1.6)   |
| Sweden                                       | 0.573 (60.0)               | 0.311 (32.6)  | 0.070 (7.3)   |
| Taiwan                                       | 0.077 (38.3)               | 0.107 (53.0)  | 0.018 (8.7)   |
| Thailand                                     | 1.283 (64.3)               | 0.606 (30.4)  | 0.107 (5.4)   |
| Turkey                                       | 0.870 (38.0)               | 1.187 (51.8)  | 0.233 (10.2)  |
| UAE                                          | 0.023 (43.4)               | 0.024 (44.9)  | 0.006 (11.7)  |
| UK                                           | 0.166 (66.3)               | 0.079 (31.8)  | 0.005 (1.8)   |
| USA                                          | 60.486 (38.9)              | 76.617 (49.2) | 18.557 (11.9) |
| <b>Total, n</b>                              | 134.313                    | 150.689       | 31.756        |
| <b>Percentage unweighted average, % (SD)</b> | 53.0 (15.3)                | 38.7 (14.0)   | 8.3 (8.3)     |
| <b>Percentage weighted average, %</b>        | 42.4                       | 47.6          | 10.0          |

Abbreviations – KDIGO: Kidney Disease: Improving Global Outcomes; SD: standard deviation; uACR: urinary albumin-creatinine ratio

**Table S7. Projected costs associated with CKD management stages G3a and G3b in the diagnosed population (prevalence – 2027) per uACR category for 31 countries and regions**

| Country or region | CKD stage G3a (billion USD) |              |             | CKD stage G3b (billion USD) |              |              |
|-------------------|-----------------------------|--------------|-------------|-----------------------------|--------------|--------------|
|                   | KDIGO uACR category         |              |             | KDIGO uACR category         |              |              |
|                   | A1                          | A2           | A3          | A1                          | A2           | A3           |
| Australia         | 0.757 (85.7)                | 0.113 (12.8) | 0.014 (1.6) | 0.138 (81.4)                | 0.028 (16.5) | 0.003 (2.0)  |
| Belgium           | 0.884 (90.2)                | 0.092 (9.4)  | 0.004 (0.4) | 0.282 (89.4)                | 0.032 (10.3) | 0.001 (0.3)  |
| Brazil            | 4.318 (92.5)                | 0.121 (2.6)  | 0.229 (4.9) | 2.235 (91.0)                | 0.079 (3.2)  | 0.141 (5.7)  |
| Canada            | 2.971 (89.6)                | 0.329 (9.9)  | 0.015 (0.4) | 1.180 (87.9)                | 0.155 (11.6) | 0.006 (0.5)  |
| China             | 15.277 (85.9)               | 2.237 (12.6) | 0.280 (1.6) | 2.591 (82.6)                | 0.488 (15.6) | 0.058 (1.9)  |
| Colombia          | 0.806 (96.4)                | 0.029 (3.4)  | 0.001 (0.2) | 0.139 (91.0)                | 0.013 (8.6)  | 0.001 (0.5)  |
| Denmark           | 0.172 (92.1)                | 0.014 (7.6)  | 0.001 (0.3) | 0.039 (88.1)                | 0.005 (11.4) | 0.000 (0.4)  |
| France            | 3.722 (92.0)                | 0.309 (7.6)  | 0.014 (0.3) | 0.782 (86.7)                | 0.115 (12.8) | 0.005 (0.5)  |
| Germany           | 4.249 (87.0)                | 0.607 (12.4) | 0.026 (0.5) | 0.848 (82.5)                | 0.174 (16.9) | 0.005 (0.5)  |
| Greece            | 0.216 (95.2)                | 0.010 (4.6)  | 0.000 (0.2) | 0.031 (91.8)                | 0.003 (7.8)  | 0.000 (0.3)  |
| Hungary           | 0.217 (93.4)                | 0.015 (6.4)  | 0.000 (0.2) | 0.076 (89.3)                | 0.009 (10.3) | 0.000 (0.3)  |
| India             | 10.172 (90.0)               | 0.984 (8.7)  | 0.149 (1.3) | 1.646 (86.5)                | 0.225 (11.8) | 0.031 (1.7)  |
| Israel            | 0.405 (79.3)                | 0.088 (17.3) | 0.017 (3.4) | 0.158 (74.6)                | 0.045 (21.3) | 0.009 (4.0)  |
| Italy             | 1.290 (93.1)                | 0.086 (6.2)  | 0.010 (0.7) | 0.663 (91.3)                | 0.056 (7.7)  | 0.007 (0.9)  |
| Japan             | 8.973 (86.0)                | 1.332 (12.8) | 0.133 (1.3) | 3.088 (83.8)                | 0.543 (14.7) | 0.053 (1.4)  |
| Saudi Arabia      | 1.488 (79.9)                | 0.188 (10.1) | 0.187 (10)  | 0.539 (73.6)                | 0.094 (12.9) | 0.099 (13.6) |
| Mexico            | 0.454 (92.5)                | 0.035 (7.2)  | 0.001 (0.3) | 0.084 (86.8)                | 0.012 (12.7) | 0.000 (0.5)  |
| Netherlands       | 0.379 (92.4)                | 0.011 (2.7)  | 0.020 (4.9) | 0.078 (90.3)                | 0.003 (3.5)  | 0.005 (6.2)  |
| Philippines       | 0.028 (91.4)                | 0.002 (7.3)  | 0.000 (1.3) | 0.017 (84.3)                | 0.003 (13.3) | 0.000 (2.4)  |
| Poland            | 0.685 (98.0)                | 0.014 (2)    | 0.000 (0.1) | 0.060 (94.0)                | 0.004 (5.8)  | 0.000 (0.2)  |
| Romania           | 4.979 (87.2)                | 0.615 (10.8) | 0.118 (2.1) | 2.310 (84.9)                | 0.343 (12.6) | 0.068 (2.5)  |
| Singapore         | 0.530 (81.6)                | 0.101 (15.6) | 0.019 (2.8) | 0.111 (77.9)                | 0.027 (19.0) | 0.004 (3.1)  |
| South Korea       | 1.204 (87.7)                | 0.150 (10.9) | 0.019 (1.4) | 0.196 (81.5)                | 0.040 (16.5) | 0.005 (2.0)  |
| Spain             | 2.277 (93.6)                | 0.147 (6.1)  | 0.008 (0.3) | 1.500 (92.1)                | 0.123 (7.5)  | 0.006 (0.4)  |

| Country or region                            | CKD stage G3a (billion USD) |              |             | CKD stage G3b (billion USD) |              |             |
|----------------------------------------------|-----------------------------|--------------|-------------|-----------------------------|--------------|-------------|
|                                              | KDIGO uACR category         |              |             | KDIGO uACR category         |              |             |
|                                              | A1                          | A2           | A3          | A1                          | A2           | A3          |
| Sweden                                       | 0.298 (94.0)                | 0.016 (5.2)  | 0.003 (0.8) | 0.191 (89.2)                | 0.0200 (9.3) | 0.003 (1.5) |
| Taiwan                                       | 0.890 (88.2)                | 0.106 (10.5) | 0.013 (1.3) | 0.140 (82.3)                | 0.027 (15.8) | 0.003 (1.9) |
| Thailand                                     | 0.816 (88.1)                | 0.096 (10.4) | 0.014 (1.6) | 0.291 (86.3)                | 0.041 (12.1) | 0.005 (1.6) |
| Turkey                                       | 1.256 (81.6)                | 0.243 (15.8) | 0.041 (2.7) | 0.407 (78.6)                | 0.097 (18.7) | 0.014 (2.7) |
| UAE                                          | 0.059 (90.5)                | 0.005 (8.0)  | 0.001 (1.5) | 0.023 (82.7)                | 0.004 (14.4) | 0.001 (2.9) |
| UK                                           | 0.144 (89.9)                | 0.015 (9.6)  | 0.001 (0.4) | 0.047 (88.6)                | 0.006 (10.9) | 0.000 (0.4) |
| USA (commercial)                             | 18.030 (86.4)               | 2.345 (11.2) | 0.500 (2.4) | 3.442 (77.6)                | 0.788 (17.8) | 0.203 (4.6) |
| USA (Medicare)                               | 29.043 (77.8)               | 7.071 (18.9) | 1.221 (3.3) | 20.251 (77.4)               | 5.065 (19.4) | 0.843 (3.2) |
| <b>Total, n</b>                              | 117.0                       | 17.5         | 3.1         | 43.58                       | 8.67         | 1.58        |
| <b>Percentage unweighted average, % (SD)</b> | 89.1 (5.1)                  | 9.2 (4.3)    | 1.7 (2.0)   | 85.3 (5.5)                  | 12.5 (4.5)   | 2.2 (2.7)   |
| <b>Percentage weighted average, %</b>        | 85.0                        | 12.7         | 2.2         | 81.0                        | 16.1         | 2.9         |

Abbreviations – KDIGO: Kidney Disease: Improving Global Outcomes; SD: standard deviation; uACR: urinary albumin-creatinine ratio

**Table S8. Projected costs associated with CKD management stages G4 and G5 in the diagnosed population (prevalence – 2027) per uACR category for 31 countries and regions**

| Country or region | CKD stage G4 (billion USD) |              |              | CKD stage G5 (billion USD) |              |              |
|-------------------|----------------------------|--------------|--------------|----------------------------|--------------|--------------|
|                   | KDIGO uACR category, n (%) |              |              | KDIGO uACR category, n (%) |              |              |
|                   | A1                         | A2           | A3           | A1                         | A2           | A3           |
| Australia         | 0.184 (69.8)               | 0.069 (26.3) | 0.010 (3.8)  | 0.070 (78.2)               | 0.018 (20.0) | 0.002 (1.8)  |
| Belgium           | 0.223 (84.0)               | 0.041 (15.4) | 0.002 (0.6)  | 0.187 (87.4)               | 0.026 (12.2) | 0.001 (0.4)  |
| Brazil            | 0.601 (83.5)               | 0.039 (5.4)  | 0.080 (11.1) | 0.175 (88.6)               | 0.009 (4.5)  | 0.014 (6.9)  |
| Canada            | 0.541 (80.1)               | 0.128 (19.0) | 0.006 (0.9)  | 0.508 (85.3)               | 0.085 (14.2) | 0.003 (0.5)  |
| China             | 1.321 (63.8)               | 0.652 (31.5) | 0.097 (4.7)  | 0.262 (79.7)               | 0.064 (19.3) | 0.003 (1.0)  |
| Colombia          | 0.044 (78.0)               | 0.012 (20.6) | 0.001 (1.4)  | 0.015 (90.6)               | 0.002 (9.1)  | 0.000 (0.3)  |
| Denmark           | 0.012 (76.4)               | 0.003 (22.4) | 0.000 (1.2)  | 0.007 (85.8)               | 0.001 (13.8) | 0.000 (0.4)  |
| France            | 0.764 (83.6)               | 0.144 (15.7) | 0.007 (0.7)  | 0.000 (0.0)                | 0.000 (0.0)  | 0.000 (0.0)  |
| Germany           | 0.289 (69.3)               | 0.122 (29.3) | 0.006 (1.3)  | 0.207 (79)                 | 0.054 (20.5) | 0.001 (0.5)  |
| Greece            | 0.023 (81.1)               | 0.005 (17.7) | 0.000 (1.1)  | 0.014 (90)                 | 0.001 (9.6)  | 0.000 (0.4)  |
| Hungary           | 0.013 (74.3)               | 0.004 (24.7) | 0.000 (0.9)  | 0.006 (86.3)               | 0.001 (13.2) | 0.000 (0.5)  |
| India             | 0.369 (74.4)               | 0.109 (21.9) | 0.018 (3.7)  | 0.207 (84.1)               | 0.036 (14.7) | 0.003 (1.2)  |
| Israel            | 0.071 (67.4)               | 0.028 (26.7) | 0.006 (5.8)  | 0.053 (72.0)               | 0.018 (24.0) | 0.003 (4.0)  |
| Italy             | 0.344 (84.2)               | 0.057 (13.9) | 0.008 (1.9)  | 0.110 (90.1)               | 0.011 (9.1)  | 0.001 (0.9)  |
| Japan             | 3.364 (74.8)               | 1.026 (22.8) | 0.105 (2.3)  | 0.548 (79.0)               | 0.135 (19.4) | 0.011 (1.6)  |
| Saudi Arabia      | 0.173 (58.5)               | 0.051 (17.3) | 0.072 (24.2) | 0.224 (68.9)               | 0.058 (17.8) | 0.043 (13.3) |
| Mexico            | 0.027 (73.2)               | 0.009 (25.4) | 0.001 (1.4)  | 0.019 (85.5)               | 0.003 (14.1) | 0.000 (0.4)  |
| Netherlands       | 0.022 (78.6)               | 0.002 (7.0)  | 0.004 (14.4) | 0.053 (90.8)               | 0.002 (3.9)  | 0.003 (5.3)  |
| Philippines       | 0.007 (70.5)               | 0.002 (23.6) | 0.001 (5.9)  | 0.001 (75.8)               | 0.000 (21.5) | 0.000 (2.7)  |
| Poland            | 0.016 (80.0)               | 0.004 (19.0) | 0.000 (0.9)  | 0.010 (94.5)               | 0.001 (5.1)  | 0.000 (0.4)  |
| Romania           | 1.243 (81.2)               | 0.234 (15.3) | 0.054 (3.5)  | 1.287 (87.2)               | 0.153 (10.4) | 0.035 (2.4)  |
| Singapore         | 0.030 (64.1)               | 0.014 (29.7) | 0.003 (6.1)  | 0.015 (75.8)               | 0.004 (21.7) | 0.000 (2.5)  |
| South Korea       | 0.167 (75.1)               | 0.049 (21.8) | 0.007 (3.1)  | 0.091 (82.2)               | 0.018 (15.9) | 0.002 (1.9)  |
| Spain             | 0.366 (83.8)               | 0.066 (15.1) | 0.005 (1.0)  | 0.169 (90.7)               | 0.017 (8.9)  | 0.001 (0.4)  |

| Country or region                            | CKD stage G4 (billion USD) |              |              | CKD stage G5 (billion USD) |              |             |
|----------------------------------------------|----------------------------|--------------|--------------|----------------------------|--------------|-------------|
|                                              | KDIGO uACR category, n (%) |              |              | KDIGO uACR category, n (%) |              |             |
|                                              | A1                         | A2           | A3           | A1                         | A2           | A3          |
| Sweden                                       | 0.084 (80.4)               | 0.017 (16.3) | 0.003 (3.3)  | 0.021 (87.0)               | 0.003 (11.6) | 0.000 (1.4) |
| Taiwan                                       | 0.195 (74.2)               | 0.059 (22.6) | 0.008 (3.2)  | 0.027 (81.0)               | 0.006 (17.0) | 0.001 (2.0) |
| Thailand                                     | 0.122 (79.7)               | 0.027 (17.5) | 0.004 (2.8)  | 0.176 (84.5)               | 0.029 (14.0) | 0.003 (1.5) |
| Turkey                                       | 0.449 (68.5)               | 0.177 (27.0) | 0.03 (4.5)   | 0.073 (73.1)               | 0.024 (23.8) | 0.003 (3.0) |
| UAE                                          | 0.020 (78.9)               | 0.004 (16.9) | 0.001 (4.1)  | 0.003 (83.5)               | 0.000 (13.6) | 0.000 (2.8) |
| UK                                           | 0.016 (80.0)               | 0.004 (19.2) | 0.000 (0.9)  | 0.009 (85.3)               | 0.002 (14.1) | 0.000 (0.6) |
| USA (commercial)                             | 1.052 (56.2)               | 0.631 (33.7) | 0.188 (10.1) | 0.286 (78.5)               | 0.057 (15.5) | 0.022 (6.0) |
| USA (Medicare)                               | 4.586 (66.6)               | 1.942 (28.2) | 0.363 (5.3)  | 1.156 (73.1)               | 0.361 (22.9) | 0.063 (4.0) |
| <b>Total, n</b>                              | 16.738                     | 5.733        | 1.089        | 5.989                      | 1.197        | 0.219       |
| <b>Percentage unweighted average, % (SD)</b> | 75.0 (7.6)                 | 20.7 (6.6)   | 4.3 (4.9)    | 83.2 (6.5)                 | 14.5 (5.6)   | 2.3 (2.7)   |
| <b>Percentage weighted average, %</b>        | 71.0                       | 24.3         | 4.6          | 80.9                       | 16.2         | 3.0         |

Abbreviations – KDIGO: Kidney Disease: Improving Global Outcomes; SD: standard deviation; uACR: urinary albumin-creatinine ratio

**Table S9. Inside CKD Scientific Steering Committee**

| Country or region                    | Expert                                 | Affiliation                                                                                                                                                                              |
|--------------------------------------|----------------------------------------|------------------------------------------------------------------------------------------------------------------------------------------------------------------------------------------|
| Australia                            | Prof. Steven Chadban                   | Royal Prince Alfred Hospital, Sydney, Australia                                                                                                                                          |
| Belgium                              | Prof. Michel Jadoul                    | Cliniques Universitaires Saint-Luc, Université catholique de Louvain, Brussels, Belgium                                                                                                  |
| Brazil                               | Prof. Marcelo Costa Batista            | Hospital Israelita Albert Einstein, São Paulo, Brazil                                                                                                                                    |
| Canada                               | Dr Navdeep Tangri                      | University of Manitoba, Winnipeg, Canada                                                                                                                                                 |
| China                                | Prof. Guisen Li                        | Sichuan Provincial People's Hospital, Chengdu, China                                                                                                                                     |
| Colombia                             | Prof. José Javier Arango Álvarez       | Universidad del Quindío, Quindío, Colombia                                                                                                                                               |
| Denmark                              | Professor Christian Fynbo Christiansen | Aarhus University Hospital, Denmark                                                                                                                                                      |
| France                               | Prof. Jean-Michel Halimi               | Service de Néphrologie-HTA, Dialyses, Transplantation Rénale, CHU Tours, Tours, France                                                                                                   |
| Germany                              | Prof. Kai-Uwe Eckardt                  | Department of Nephrology and Medical Intensive Care, Charité Universitätsmedizin Berlin, Berlin, Germany                                                                                 |
| Greece                               | Dr. Panagiotis Stafylas                | Medical Research & Innovation (HealThink), Thessaloniki, Greece, and Laboratory of Clinical Pharmacology, School of Medicine, Aristotle University of Thessaloniki, Thessaloniki, Greece |
| Hungary                              | Prof. Istvan Wittmann                  | President of Hungarian Diabetes Society and Hungarian College of nephrologists and Head of the Internal Medicine Department II. at University of Pécs.                                   |
| India                                | Prof. Vivekanand Jha                   | George Institute for Global Health India, New Delhi, India                                                                                                                               |
| Israel                               | Prof. Avraham Karasik                  | Maccabi Institute for Research and Innovation, Tel-Aviv, Israel                                                                                                                          |
| Israel                               | Prof. Gil Chernin                      | Kaplan Medical Center, Faculty of Medicine, Hebrew University of Jerusalem, Jerusalem, Israel                                                                                            |
| Italy                                | Prof. Francesco Saverio Mennini        | CEIS-EEHTA, Faculty of Economics, University of Rome Tor Vergata, Rome, Italy                                                                                                            |
| Italy                                | Prof. Luca De Nicola                   | Department of Advanced Medical and Surgical Sciences, University of Campania Luigi Vanvitelli, Naples, Italy                                                                             |
| Japan                                | Prof. Eiichiro Kanda                   | Kawasaki Medical University, Okayama, Japan                                                                                                                                              |
| Mexico                               | Prof. José Ricardo Correa-Rotter       | Instituto Nacional de Ciencias Médicas y Nutrición Salvador Zubirán Mexico City, Mexico                                                                                                  |
| Netherlands                          | Dr Chris Hagen                         | Meander Medical Centre                                                                                                                                                                   |
| Philippines, Singapore, and Thailand | Assoc. Prof. Jason Choo Chon Jun       | Singapore General Hospital, Singapore                                                                                                                                                    |
| Poland                               | Prof. Michał Nowicki                   | Warsaw University of Technology                                                                                                                                                          |
| Romania                              | Prof. Dr. Ismail Gener                 | Fundeni Institute                                                                                                                                                                        |

| Country or region        | Expert                                | Affiliation                                                                                                                                  |
|--------------------------|---------------------------------------|----------------------------------------------------------------------------------------------------------------------------------------------|
| Saudi Arabia             | Prof. Saeed M. G. Al-Ghamdi           | King Abdulaziz University Hospital and King Faisal Specialist Hospital and Research Centre, Jeddah, Saudi Arabia                             |
| South Korea              | Prof. Kook-Hwan Oh                    | Seoul National University College of Medicine, Seoul, South Korea                                                                            |
| Spain                    | Prof. Juan Francisco Navarro-González | Research Unit and Nephrology Service, University Hospital Nuestra Señora de Candelaria, Santa Cruz de Tenerife, Spain                        |
| Sweden                   | Prof. Johan Ärnlöv                    | Department of Neurobiology, Care Sciences and Society, Division of Family Medicine and Primary Care, Karolinska Institute, Stockholm, Sweden |
| Taiwan                   | Prof. Mai-Szu Wu                      | Division of Nephrology, Taipei Medical University, Taipei, Taiwan                                                                            |
| Turkey                   | Prof. Mustafa ARICI                   | Hacettepe University Faculty of Medicine, Department of Nephrology, Ankara, Turkey                                                           |
| United Arab Emirates     | Prof. Stephen Holt                    | SEHA Kidney Care, Abu Dhabi, UAE                                                                                                             |
| United Kingdom           | Dr Albert Power                       | North Bristol NHS Trust, Bristol, UK                                                                                                         |
| United States of America | Prof. Glenn Chertow                   | Stanford University School of Medicine, California, USA                                                                                      |
| United States of America | Prof. Jay Wish                        | Indiana University School of Medicine, Indianapolis, USA                                                                                     |



**Table S10. GATHER checklist**

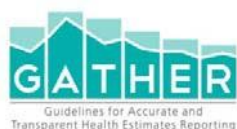

**Checklist of information that should be included in new reports of global health estimates**

| <b>Item #</b>                                                                                         | <b>Checklist item</b>                                                                                                                                                                                                                                                                                                                                                                     | <b>Reported on page #</b>                                            |
|-------------------------------------------------------------------------------------------------------|-------------------------------------------------------------------------------------------------------------------------------------------------------------------------------------------------------------------------------------------------------------------------------------------------------------------------------------------------------------------------------------------|----------------------------------------------------------------------|
| <b>Objectives and funding</b>                                                                         |                                                                                                                                                                                                                                                                                                                                                                                           |                                                                      |
| 1                                                                                                     | Define the indicator(s), populations (including age, sex, and geographic entities), and time period(s) for which estimates were made.                                                                                                                                                                                                                                                     | 7                                                                    |
| 2                                                                                                     | List the funding sources for the work.                                                                                                                                                                                                                                                                                                                                                    | 20                                                                   |
| <b>Data Inputs</b>                                                                                    |                                                                                                                                                                                                                                                                                                                                                                                           |                                                                      |
| <i>For all data inputs from multiple sources that are synthesized as part of the study:</i>           |                                                                                                                                                                                                                                                                                                                                                                                           |                                                                      |
| 3                                                                                                     | Describe how the data were identified and how the data were accessed.                                                                                                                                                                                                                                                                                                                     | 9 -11 (Pecoits-Filho et al, 2021; Levey et al 2011; Jha et al, 2023) |
| 4                                                                                                     | Specify the inclusion and exclusion criteria. Identify all ad-hoc exclusions.                                                                                                                                                                                                                                                                                                             | 9 -11 (Pecoits-Filho et al, 2021; Levey et al 2011; Jha et al, 2023) |
| 5                                                                                                     | Provide information on all included data sources and their main characteristics. For each data source used, report reference information or contact name/institution, population represented, data collection method, year(s) of data collection, sex and age range, diagnostic criteria or measurement method, and sample size, as relevant.                                             | 9 -11 (Pecoits-Filho et al, 2021; Levey et al 2011; Jha et al, 2023) |
| 6                                                                                                     | Identify and describe any categories of input data that have potentially important biases (e.g., based on characteristics listed in item 5).                                                                                                                                                                                                                                              | 18-19                                                                |
| <i>For data inputs that contribute to the analysis but were not synthesized as part of the study:</i> |                                                                                                                                                                                                                                                                                                                                                                                           |                                                                      |
| 7                                                                                                     | Describe and give sources for any other data inputs.                                                                                                                                                                                                                                                                                                                                      | 11                                                                   |
| <i>For all data inputs:</i>                                                                           |                                                                                                                                                                                                                                                                                                                                                                                           |                                                                      |
| 8                                                                                                     | Provide all data inputs in a file format from which data can be efficiently extracted (e.g., a spreadsheet rather than a PDF), including all relevant meta-data listed in item 5. For any data inputs that cannot be shared because of ethical or legal reasons, such as third-party ownership, provide a contact name or the name of the institution that retains the right to the data. | Available on request                                                 |
| <b>Data analysis</b>                                                                                  |                                                                                                                                                                                                                                                                                                                                                                                           |                                                                      |
| 9                                                                                                     | Provide a conceptual overview of the data analysis method. A diagram may be helpful.                                                                                                                                                                                                                                                                                                      | 7                                                                    |
| 10                                                                                                    | Provide a detailed description of all steps of the analysis, including mathematical formulae. This description should cover, as relevant, data cleaning, data pre-processing, data adjustments and weighting of data sources, and mathematical or statistical model(s).                                                                                                                   | 7 + Tangri et al                                                     |
| 11                                                                                                    | Describe how candidate models were evaluated and how the final model(s) were selected.                                                                                                                                                                                                                                                                                                    | 7 + Tangri et al                                                     |
| 12                                                                                                    | Provide the results of an evaluation of model performance, if done, as well as the results of any relevant sensitivity analysis.                                                                                                                                                                                                                                                          | 8 +16                                                                |
| 13                                                                                                    | Describe methods for calculating uncertainty of the estimates. State which sources of uncertainty were, and were not, accounted for in the uncertainty analysis.                                                                                                                                                                                                                          | 18                                                                   |
| 14                                                                                                    | State how analytic or statistical source code used to generate estimates can be accessed.                                                                                                                                                                                                                                                                                                 | 11                                                                   |

| <b>Results and Discussion</b> |                                                                                                                                                          |                                          |
|-------------------------------|----------------------------------------------------------------------------------------------------------------------------------------------------------|------------------------------------------|
| <b>15</b>                     | Provide published estimates in a file format from which data can be efficiently extracted.                                                               | Supplementary file p 2-19                |
| <b>16</b>                     | Report a quantitative measure of the uncertainty of the estimates (e.g. uncertainty intervals).                                                          | 12 – 13 and Supplementary files p 2 - 19 |
| <b>17</b>                     | Interpret results in light of existing evidence. If updating a previous set of estimates, describe the reasons for changes in estimates.                 | 16-19                                    |
| <b>18</b>                     | Discuss limitations of the estimates. Include a discussion of any modelling assumptions or data limitations that affect interpretation of the estimates. | 18                                       |

*This checklist should be used in conjunction with the GATHER statement and Explanation and Elaboration document, found on [gather-statement.org](http://gather-statement.org)*
